July 2012

# PSYCHIATRIC SERVICES

A Journal of the  
American Psychiatric  
Association

- ◆ Medicare's Exclusion  
of Benzodiazepines:  
Effects on Patients
- ◆ Schizophrenia Portrayals  
in 41 Contemporary Films:  
Persistent Negative Images
- ◆ Do Longer Detentions  
Reduce Commitments?  
A Closer Look in Virginia
- ◆ Everyday Problems,  
Everyday Solutions:  
Supporting Recovery

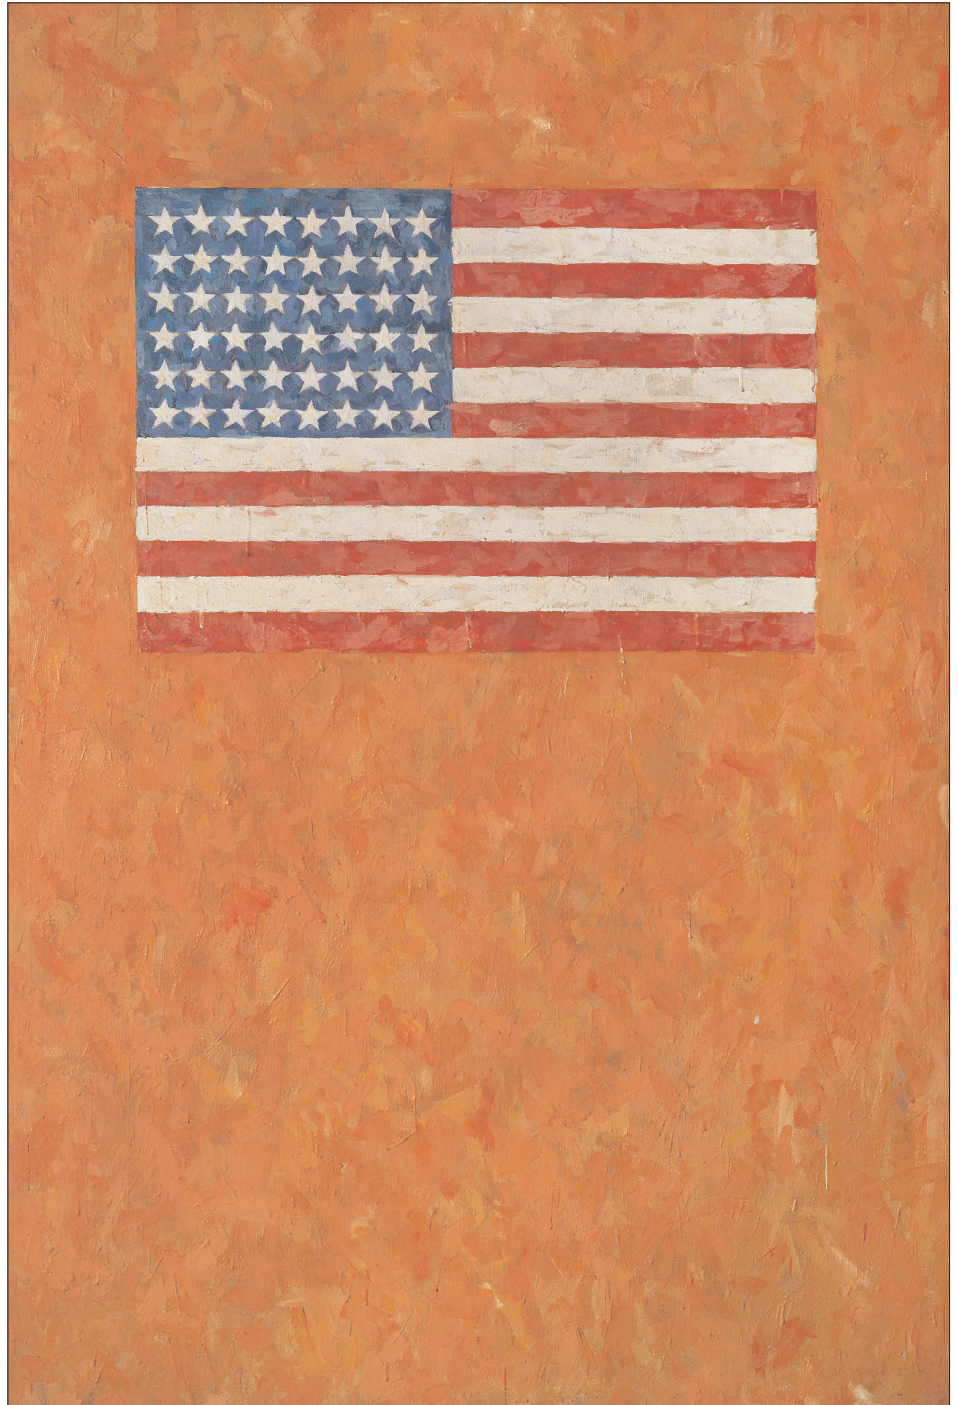

Source: https://ps.psychiatryonline.org/doi/suppl/10.1176/ps.2012.63.issue-7/suppl_file/cover.pdf
